# Supplementary material for: Changes in household use of disinfectant and cleaning products during the first lockdown period in France
Source: Springer Nature journal article supplement (doi:10.1186/s12889-024-20202-8), 2024-10-02
Supplement: MOESM1 [file 12889_2024_20202_MOESM1_ESM.pdf]

Supplementary material

## Changes in household use of disinfectants and cleaning products during the first lockdown period in France

**Figure S1a.** SAPRIS questionnaire in the NutriNet-Santé cohort

SAPRIS Q1 – 1. In the last 7 days, on how many days a week did you perform home cleaning?

\_\_ minute(s) \_\_ hour(s)

SAPRIS Q1 – 2. In the last 7 days, have you received any help to do home cleaning from relatives, a household employee or an association?

1. *Yes*
2. *No, I don't need it*
3. *No, I did not need it*
4. *No, but I would need it*

SAPRIS Q1 – 3. Currently in your home, who is in charge of household tasks?

- 1 *Always myself*
- 2 *Most often myself*
- 3 *Both myself and my spouse*
- 4 *Most often my spouse*
- 5 *Always my spouse*
- 6 *Always or most often other family members*

SAPRIS Q1 – 4. Since the lockdown period, how much total time per week do you use cleaning products in liquid form, foam, wipe, spray, etc.?

1. *Never*
2. *Less than 10 minutes per week*
3. *Between 10 to 30 minutes per week*
4. *Between 30 minutes to 1 hour per week*
5. *Between 1 to 2 hours per week*
6. *More than 2 hours per week*

SAPRIS Q1 – 5. Since the lockdown period, do you use some cleaning products more frequently?

1. *Yes*

Which one(s)?

1. *Hand sanitizer*
2. *White vinegar*
3. *Bleach*
4. *Other disinfectants in liquid form, foam, spray or wipe*
5. *Other cleaning products*

2. *No*

**Figure S1b.** SAPRIS questionnaire in the CONSTANCES cohort

SAPRIS Q1 – 1. In the last 7 days, on how many days a week did you perform home cleaning?

1. *0 minutes*
2. *Less than 30 minutes*
3. *Between 30 minutes and less than 1 hour*
4. *Between 1 hour and less than 2 hours*
5. *Between 2 hours and less than 4 hours*
6. *Between 4 hours and less than 6 hours*
7. *6 hours and more*

SAPRIS Q1 – 2. In the last 7 days, have you received any help to do home cleaning from relatives, a household employee or an association?

1. *Yes*
2. *No, I don't need it*
3. *No, but I would need it*

SAPRIS Q1 – 3. Currently in your home, who is in charge of household tasks?

1. *Always myself*
2. *Most often myself*
3. *Both myself and my spouse*
4. *Most often my spouse*
5. *Always my spouse*
6. *Always or most often other family members*
7. *Both myself and other family members*

SAPRIS Q2 – 1. Since the lockdown period, how much total time per week do you use cleaning products in liquid form, foam, wipe, spray, etc.?

1. *Never*
2. *Less than 10 minutes per week*
3. *Between 10 to 30 minutes per week*
4. *Between 30 minutes to 1 hour per week*
5. *Between 1 to 2 hours per week*
6. *More than 2 hours per week*

SAPRIS Q2 – 2. Since the lockdown period, do you use some cleaning products more frequently?

1. *Hand sanitizer*
2. *White vinegar*
3. *Bleach*
4. *Other disinfectants in liquid form, foam, spray or wipe*
5. *Other cleaning products*
6. *None of these products*

**Table S1.** Included and excluded participants characteristics

|                                                        | Participants of the NutriNet-Santé Study |                                                    |         | Participants of the CONSTANCES study |                                                                |         |                                                                                                                |         |
|--------------------------------------------------------|------------------------------------------|----------------------------------------------------|---------|--------------------------------------|----------------------------------------------------------------|---------|----------------------------------------------------------------------------------------------------------------|---------|
|                                                        | Study population<br>n = 31,105           | Missing data for SAPRIS questionnaire<br>n = 8,038 | p       | Study population<br>n = 49,491       | Paper questionnaire and no invitation for SAPRIS<br>n = 58,390 | p       | Participants excluded from the analyses<br>Missing data Q1 and Q2 of the SAPRIS web questionnaire<br>n = 9,677 | p       |
| <b>Gender, n (%)</b>                                   |                                          |                                                    |         |                                      |                                                                |         |                                                                                                                |         |
| Men                                                    | 7,822 (25.2)                             | 1,792 (22.3)                                       | <0.0001 | 24,288 (49.1)                        | 24,255 (41.5)                                                  | <0.0001 | 4,974 (51.4)                                                                                                   | <0.0001 |
| Women                                                  | 23,283 (74.8)                            | 6,246 (77.7)                                       |         | 25,203 (50.9)                        | 34,135 (58.5)                                                  |         | 4,702 (48.6)                                                                                                   |         |
| <b>Age (years), mean ± s.d</b>                         | 48.2 ± 13.6                              | 44.6 ± 15.1                                        | <0.0001 | 47.5 ± 13.1                          | 50.1 ± 13.1                                                    | <0.0001 | 43.8 ± 13.1                                                                                                    | 0.002   |
| <b>Smoking status, n (%)</b>                           |                                          |                                                    |         |                                      |                                                                |         |                                                                                                                |         |
| Never smoker                                           | 15,718 (50.8)                            | 4,084 (51.4)                                       | <0.0001 | 24,398 (50.8)                        | 27,209 (48.6)                                                  | <0.0001 | 4,657 (49.6)                                                                                                   | <0.0001 |
| Ex-smoker                                              | 11,488 (37.2)                            | 2,691 (33.9)                                       |         | 17,279 (35.9)                        | 19,688 (35.2)                                                  |         | 3,163 (33.7)                                                                                                   |         |
| Current smoker                                         | 3,722 (12.0)                             | 1,165 (14.7)                                       |         | 6,391 (13.3)                         | 9,087 (16.2)                                                   |         | 1,564 (16.7)                                                                                                   |         |
| <b>BMI (Body Mass Index - kg/m<sup>2</sup>), n (%)</b> |                                          |                                                    |         |                                      |                                                                |         |                                                                                                                |         |
| < 25                                                   | 20,936 (68.1)                            | 5,321 (67.3)                                       | <0.0001 | 29,436 (61.1)                        | 31,264 (55.1)                                                  | <0.0001 | 5,722 (60.7)                                                                                                   | 0.045   |
| [25 – 30[                                              | 7,200 (23.4)                             | 1,778 (22.5)                                       |         | 14,228 (29.6)                        | 18,006 (31.7)                                                  |         | 2,739 (29.0)                                                                                                   |         |
| ≥ 30                                                   | 2,627 (8.5)                              | 810 (10.2)                                         |         | 4,501 (9.3)                          | 7,521 (13.2)                                                   |         | 967 (10.3)                                                                                                     |         |
| <b>Educational level, n (%)</b>                        |                                          |                                                    |         |                                      |                                                                |         |                                                                                                                |         |
| <high school diploma                                   | 6,410 (19.4)                             | 1,516 (20.5)                                       | <0.0001 | 6,384 (13.0)                         | 17,292 (30.2)                                                  | <0.0001 | 1,415 (14.8)                                                                                                   | <0.0001 |
| high school to 1-year post-secondary                   | 5,233 (15.9)                             | 1,305 (17.7)                                       |         | 6,933 (14.2)                         | 9,812 (17.1)                                                   |         | 1,502 (15.7)                                                                                                   |         |
| 2-3 years post-secondary                               | 9,257 (28.0)                             | 2,056 (27.8)                                       |         | 13,675 (27.9)                        | 14,753 (25.7)                                                  |         | 2,741(28.7)                                                                                                    |         |
| >3 years post-secondary                                | 12,135 (36.7)                            | 2,512 (34.0)                                       |         | 22,009 (44.9)                        | 15,440 (27.0)                                                  |         | 3,906 (40.8)                                                                                                   |         |

Comparison of participants included in our study population with those excluded from the analysis by Chi-squared tests for categorial variables and t-tests for continuous variables (age).

**Table S2.** Household cleaning habits in 2018/2019 and since the lockdown period

|                                                  | Participants of the NutriNet-Santé study, n = 31,105 |                                          |         | Participants of the CONSTANCES study, n = 49,491 |                                          |                                         |         |
|--------------------------------------------------|------------------------------------------------------|------------------------------------------|---------|--------------------------------------------------|------------------------------------------|-----------------------------------------|---------|
|                                                  | Household exposure questionnaire of 2018             | SAPRIS Q1 <sup>1</sup> , during lockdown | p       | Household exposure questionnaire of 2019         | SAPRIS Q1 <sup>1</sup> , during lockdown | SAPRIS Q2 <sup>2</sup> , after lockdown | p       |
| <b>Household help, %</b>                         | 40.1                                                 | 5.4                                      | <0.0001 | 55.6                                             | 2.9                                      | -                                       | <0.0001 |
| By the participant                               |                                                      | 33.8                                     |         |                                                  | 9.4                                      |                                         |         |
| Most often by the participant                    |                                                      | 26.1                                     |         |                                                  | 24.1                                     |                                         |         |
| Both by the participant and his/her spouse       |                                                      | 26.8                                     |         |                                                  | 39.5                                     |                                         |         |
| Most often by the participants' spouse           | -                                                    | 9.9                                      |         | -                                                | 18.9                                     |                                         |         |
| By the participants' spouse                      |                                                      | 1.8                                      |         |                                                  | 1.8                                      | -                                       |         |
| By other family members                          |                                                      | 1.6                                      |         |                                                  | 4.9                                      |                                         |         |
| Both by the participant and other family members |                                                      | -                                        |         |                                                  | 1.4                                      |                                         |         |
| <b>Home cleaning, %</b>                          |                                                      |                                          |         |                                                  |                                          |                                         |         |
| <1 day/week                                      | 37.3                                                 | 1.0                                      | <0.0001 | 43.1                                             | 0.3                                      |                                         | <0.0001 |
| ≥1 day/week                                      | 62.7                                                 | 99.0                                     |         | 56.9                                             | 99.7                                     |                                         |         |
| 0 minute/week                                    |                                                      | 1.0                                      |         |                                                  | 0.3                                      |                                         |         |
| <30 minutes/week                                 |                                                      | 1.3                                      |         |                                                  | 8.5                                      |                                         |         |
| 30 minutes-1 hour/week                           |                                                      | 5.8                                      |         |                                                  | 27.0                                     |                                         |         |
| 1-2 hours/week                                   | -                                                    | 30.4                                     |         | -                                                | 40.4                                     | -                                       |         |
| 2-4 hours/week                                   |                                                      | 47.8                                     |         |                                                  | 20.8                                     |                                         |         |
| 4-6 hours/week                                   |                                                      | 9.5                                      |         |                                                  | 2.5                                      |                                         |         |
| ≥6 hours/week                                    |                                                      | 4.2                                      |         |                                                  | 0.5                                      |                                         |         |
| <b>Frequency of use, %</b>                       |                                                      |                                          |         |                                                  |                                          |                                         |         |
| Unchanged                                        | -                                                    | 45.3                                     |         | -                                                | -                                        | 16.6                                    |         |
| Increased <sup>3</sup>                           |                                                      | 54.7                                     |         |                                                  |                                          | 83.4                                    |         |
| Hand sanitizer, %                                |                                                      | 44.0                                     |         |                                                  |                                          | 78.5                                    |         |
| White vinegar, %                                 |                                                      | 34.6                                     |         |                                                  |                                          | 63.3                                    |         |
| Bleach, %                                        | -                                                    | 29.7                                     |         | -                                                | -                                        | 54.0                                    |         |
| Disinfectants, %                                 |                                                      | 30.4                                     |         |                                                  |                                          | 60.3                                    |         |
| Other cleaning products, %                       |                                                      | 32.1                                     |         |                                                  |                                          | 66.0                                    |         |
| <b>Duration of use, %</b>                        |                                                      |                                          |         |                                                  |                                          |                                         |         |
| <1 day/week                                      | 42.2                                                 | 22.8                                     | <0.0001 | 8.7                                              |                                          | 4.2                                     | <0.0001 |
| <10 minutes/week                                 | 21.9                                                 | 13.4                                     |         | 48.5                                             | -                                        | 11.2                                    |         |
| 10-30 minutes/week                               | 18.1                                                 | 19.5                                     |         | 27.2                                             |                                          | 21.5                                    |         |
| > 30 minutes/week                                | 17.8                                                 | 44.3                                     |         | 15.6                                             |                                          | 63.1                                    |         |

<sup>1</sup> Q1 questionnaire was asked from April 1 to May 12, 2020 during the first lockdown period in France (March 17 to May 3, 2020)

<sup>2</sup> Q2 questionnaire was asked from May 5 to June 15, 2020 right after the first lockdown period in France

<sup>3</sup> Increased use: participants who reported an increased use of at least one of the five HDCPs studied (hand sanitizer, white vinegar, bleach, disinfectants, other cleaning products)

Comparison of household cleaning habits in 2018/2019 and since the lockdown period by a McNemar's test for household help and home cleaning and a Bhapkar test for the duration of weekly use of HDCPs.

**Table S3.** Duration of weekly use of HDCPS in 2018/2019 and since the lockdown period according to age for men and women

| Participants of the NutriNet-Santé study, n = 31,105 |         |          |                       |         |          |         | Participants of the CONSTANCES study, n = 49,491 |          |         |                       |          |         |
|------------------------------------------------------|---------|----------|-----------------------|---------|----------|---------|--------------------------------------------------|----------|---------|-----------------------|----------|---------|
| <45 ans<br>n = 11,468                                |         |          | ≥45 ans<br>n = 21,766 |         |          |         | <45 ans<br>n = 21,766                            |          |         | ≥45 ans<br>n = 19,437 |          |         |
|                                                      | In 2018 | Lockdown | p                     | In 2018 | Lockdown | p       | In 2019                                          | Lockdown | p       | In 2019               | Lockdown | p       |
| <b>Men</b>                                           |         |          |                       |         |          |         |                                                  |          |         |                       |          |         |
| Duration of use, %                                   |         |          |                       |         |          |         |                                                  |          |         |                       |          |         |
| <1 day/week                                          | 47.9    | 28.4     | <0.0001               | 59.6    | 27.1     | <0.0001 | 9.1                                              | 5.0      | <0.0001 | 13.0                  | 5.7      | <0.0001 |
| <10 minutes/week                                     | 23.3    | 18.4     |                       | 22.2    | 15.6     |         | 51.4                                             | 16.2     |         | 54.8                  | 14.0     |         |
| 10-30 minutes/week                                   | 17.3    | 21.2     |                       | 11.7    | 21.8     |         | 26.4                                             | 26.5     |         | 22.8                  | 24.7     |         |
| > 30 minutes/week                                    | 11.5    | 32.0     |                       | 6.5     | 35.5     |         | 13.1                                             | 52.3     |         | 9.4                   | 55.6     |         |
| <b>Women</b>                                         |         |          |                       |         |          |         |                                                  |          |         |                       |          |         |
| Duration of use, %                                   |         |          |                       |         |          |         |                                                  |          |         |                       |          |         |
| <1 day/week                                          | 31.2    | 21.3     | <0.0001               | 41.4    | 21.0     | <0.0001 | 5.6                                              | 2.8      | <0.0001 | 6.5                   | 3.2      | <0.0001 |
| <10 minutes/week                                     | 20.0    | 13.3     |                       | 22.9    | 11.7     |         | 40.7                                             | 9.2      |         | 46.6                  | 6.5      |         |
| 10-30 minutes/week                                   | 21.9    | 20.0     |                       | 18.4    | 18.1     |         | 30.3                                             | 19.9     |         | 29.9                  | 15.8     |         |
| > 30 minutes/week                                    | 26.9    | 45.4     |                       | 17.3    | 49.2     |         | 23.4                                             | 68.1     |         | 17.0                  | 74.5     |         |

The question about the duration of weekly use of HDCPs was asked at two different time-points in NutriNet-Santé (Q1: April 1-May 12, 2020) and in CONSTANCES (Q2: May 5-June 15, 2020). Comparison of the duration of weekly use of HDCPs in 2018/2019 and during the first lockdown period in France (March 17 to May 3, 2020) by a Bhapkar test.

**Table S4.** Duration of weekly use of HDCPS in 2018/2019 and since the lockdown period according to educational level for men and women

| Participants of the NutriNet-Santé study, n = 31,105 |          |      |                                    |          |      |         | Participants of the CONSTANCES study, n = 49,491 |      |         |                                    |      |         |
|------------------------------------------------------|----------|------|------------------------------------|----------|------|---------|--------------------------------------------------|------|---------|------------------------------------|------|---------|
| ≤high school diploma<br>n = 10,238                   |          |      | >high school diploma<br>n = 18,544 |          |      |         | ≤high school diploma<br>n = 13,317               |      |         | >high school diploma<br>n = 35,684 |      |         |
| In 2018                                              | Lockdown | p    | In 2018                            | Lockdown | p    | In 2019 | Lockdown                                         | p    | In 2019 | Lockdown                           | p    |         |
| <b>Men</b>                                           |          |      |                                    |          |      |         |                                                  |      |         |                                    |      |         |
| Duration of use, %                                   |          |      |                                    |          |      |         |                                                  |      |         |                                    |      |         |
| <1 day/week                                          | 58.1     | 27.4 | <0.0001                            | 56.1     | 27.8 | <0.0001 | 11.8                                             | 5.6  | <0.0001 | 11.3                               | 5.4  | <0.0001 |
| <10 minutes/week                                     | 21.2     | 14.7 |                                    | 22.9     | 17.5 |         | 51.8                                             | 13.1 |         | 54.0                               | 15.5 |         |
| 10-30 minutes/week                                   | 12.4     | 21.3 |                                    | 13.6     | 21.6 |         | 25.3                                             | 24.9 |         | 23.8                               | 25.6 |         |
| > 30 minutes/week                                    | 8.3      | 36.6 |                                    | 7.4      | 33.1 |         | 11.1                                             | 56.4 |         | 10.9                               | 53.5 |         |
| <b>Women</b>                                         |          |      |                                    |          |      |         |                                                  |      |         |                                    |      |         |
| Duration of use, %                                   |          |      |                                    |          |      |         |                                                  |      |         |                                    |      |         |
| <1 day/week                                          | 37.6     | 21.0 | <0.0001                            | 37.0     | 21.2 | <0.0001 | 5.9                                              | 2.7  | <0.0001 | 6.1                                | 3.1  | <0.0001 |
| <10 minutes/week                                     | 21.3     | 11.0 |                                    | 22.0     | 13.4 |         | 42.0                                             | 6.4  |         | 44.6                               | 8.2  |         |
| 10-30 minutes/week                                   | 19.1     | 17.1 |                                    | 20.4     | 20.0 |         | 31.1                                             | 15.6 |         | 29.7                               | 18.4 |         |
| > 30 minutes/week                                    | 22.0     | 50.9 |                                    | 20.6     | 45.4 |         | 21.0                                             | 75.3 |         | 19.6                               | 70.3 |         |

The question about the duration of weekly use of HDCPs was asked at two different time-points in NutriNet-Santé (Q1: April 1-May 12, 2020) and in CONSTANCES (Q2: May 5-June 15, 2020). Comparison of the duration of weekly use of HDCPs in 2018/2019 and during the first lockdown period in France (March 17 to May 3, 2020) by a Bhapkar test.

**Table S5.** Comparison of household cleaning habits in 2018 and 2020 - NutriNet-Santé

| Participants of the NutriNet-Santé study<br>n = 28,331 | Household exposure<br>questionnaire of 2018 | Household exposure<br>questionnaire of 2020<br>after lockdown period | p       |
|--------------------------------------------------------|---------------------------------------------|----------------------------------------------------------------------|---------|
| <b>Irritants</b>                                       |                                             |                                                                      |         |
| Bleach, %                                              |                                             |                                                                      |         |
| <1 day/week                                            | 86.3                                        | 83.1                                                                 | <0.0001 |
| 1-3 days/week                                          | 11.5                                        | 13.4                                                                 |         |
| 4-7 days/week                                          | 2.2                                         | 3.5                                                                  |         |
| Ammonia, %                                             |                                             |                                                                      |         |
| <1 day/week                                            | 99.5                                        | 99.5                                                                 | 0.09    |
| 1-3 days/week                                          | 0.4                                         | 0.5                                                                  |         |
| 4-7 days/week                                          | 0.1                                         | 0                                                                    |         |
| Acids, %                                               |                                             |                                                                      |         |
| <1 day/week                                            | 75.1                                        | 96.3                                                                 | <0.0001 |
| 1-3 days/week                                          | 21.3                                        | 3.4                                                                  |         |
| 4-7 days/week                                          | 3.6                                         | 0.3                                                                  |         |
| Solvents, %                                            |                                             |                                                                      |         |
| <1 day/week                                            | 95.5                                        | 96.7                                                                 | <0.0001 |
| 1-3 days/week                                          | 4.2                                         | 3.1                                                                  |         |
| 4-7 days/week                                          | 0.3                                         | 0.2                                                                  |         |
| <b>Sprays</b>                                          |                                             |                                                                      |         |
| Furniture, %                                           |                                             |                                                                      |         |
| <1 day/week                                            | 90.7                                        | 86.0                                                                 | <0.0001 |
| 1-3 days/week                                          | 7.1                                         | 9.8                                                                  |         |
| 4-7 days/week                                          | 2.2                                         | 4.2                                                                  |         |
| Glass, %                                               |                                             |                                                                      |         |
| <1 day/week                                            | 94.5                                        | 93.6                                                                 | <0.0001 |
| 1-3 days/week                                          | 4.9                                         | 5.8                                                                  |         |
| 4-7 days/week                                          | 0.6                                         | 0.6                                                                  |         |
| Bath, %                                                |                                             |                                                                      |         |
| <1 day/week                                            | 86.9                                        | 84.4                                                                 | <0.0001 |
| 1-3 days/week                                          | 11.8                                        | 13.7                                                                 |         |
| 4-7 days/week                                          | 1.3                                         | 1.9                                                                  |         |
| Air freshener, %                                       |                                             |                                                                      |         |
| <1 day/week                                            | 89.1                                        | 90.2                                                                 | <0.0001 |
| 1-3 days/week                                          | 7.0                                         | 6.1                                                                  |         |
| 4-7 days/week                                          | 3.9                                         | 3.7                                                                  |         |

Comparison of the frequency of weekly use of cleaning products in 2018 and in May-October 2020 by a Bhapkar test.
